# Supplementary material for: Regulatory Role of GSK-3βon NF-κB, Nitric Oxide, and TNF-αin Group A Streptococcal Infection
Source: Hindawi journal article supplement (doi:10.1155/2013/720689), 2013-01-01

# Supplemental figure 1

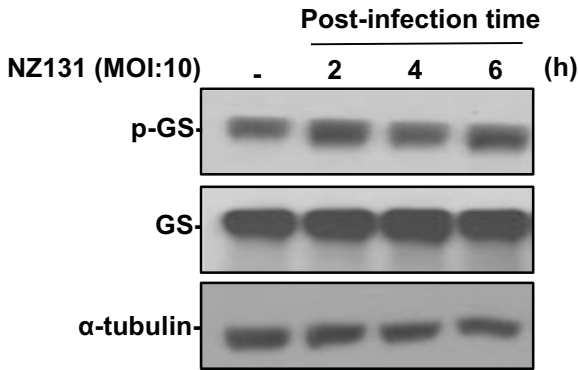

Supplement: f1 [file 720689.f1.pdf]
