# Supplementary material for: Regulatory Role of GSK-3βon NF-κB, Nitric Oxide, and TNF-αin Group A Streptococcal Infection
Source: Hindawi journal article supplement (doi:10.1155/2013/720689), 2013-01-01

Supplemental figure 3

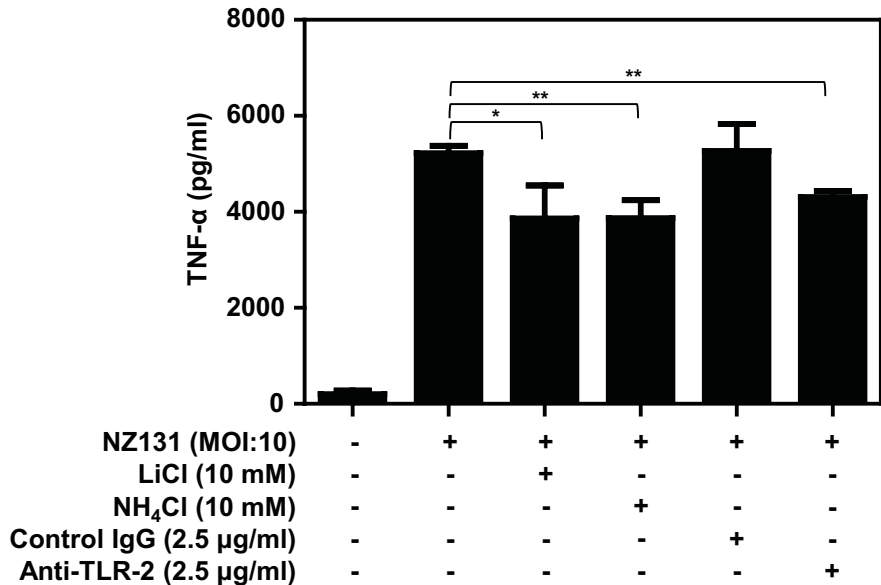

Supplement: f3 [file 720689.f3.pdf]
